# Supplementary material for: A Unique and Scalable Model for Increasing Research Engagement, STEM Persistence, and Entry into Doctoral Programs
Source: PubMed Central journal article supplement — CBE Life Sci Educ. 2021 Spring;20(1):ar11. doi: 10.1187/cbe.20-09-0224 (PMC8108502; doi:10.1187/cbe.20-09-0224), 2021
Supplement: cbe-20-ar11-s001.pdf [file cbe-20-ar11-s001.pdf]

# Supplemental Material

*CBE—Life Sciences Education*

Sellami *et al.*

## Supplementary materials

### Contents

|                              |   |
|------------------------------|---|
| Supplementary materials..... | 1 |
| Supplementary Figure.....    | 1 |
| Supplementary Tables .....   | 2 |
| Codebook .....               | 8 |

### Supplementary Figure

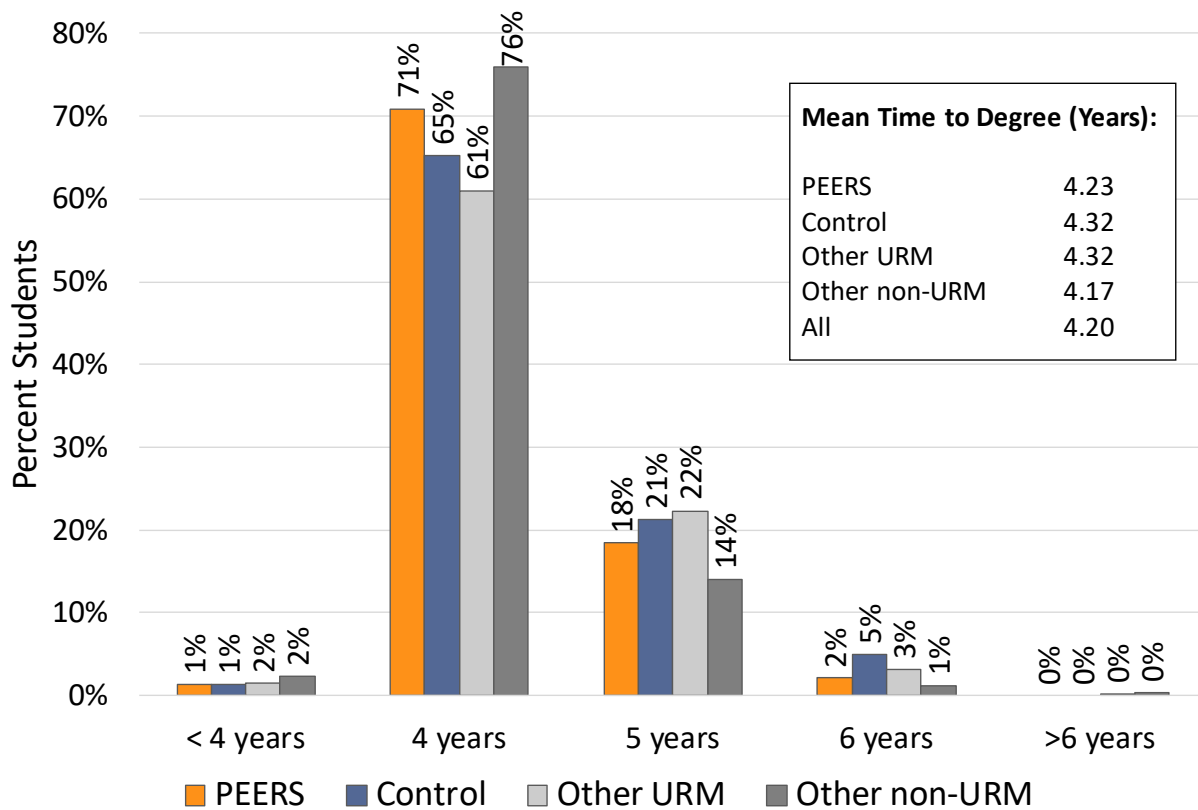

**Figure S 1:** Distribution of time to degree for the indicated student groups. Box insert: mean time to degree. The groups are significantly different from each other (ANOVA,  $p=0.000$ ). Significant pairwise differences (ANOVA with Bonferroni correction) are found between other non-URM with Control ( $p=0.005$ ) and other non-URM with other URM ( $p=0.000$ ). All other groups are not significantly different from each other ( $p>0.05$ ).

## Supplementary Tables

| <b>Supplementary table 1. Participation in undergraduate research by group*</b> |             |     |                 |     |             |     |               |      |             |      |  |
|---------------------------------------------------------------------------------|-------------|-----|-----------------|-----|-------------|-----|---------------|------|-------------|------|--|
|                                                                                 | PEERS       |     | Matched Control |     | Other URM   |     | Other Non-URM |      | All         |      |  |
|                                                                                 | %           | N   | %               | N   | %           | N   | %             | N    | %           | N    |  |
| Assisted UCLA faculty in research for pay                                       | <b>29.7</b> | 91  | <b>11.8</b>     | 102 | <b>13.7</b> | 542 | <b>13.4</b>   | 1774 | <b>13.9</b> | 2509 |  |
| Assisted UCLA faculty in research as a volunteer                                | <b>62.6</b> | 91  | <b>45.6</b>     | 103 | <b>39.7</b> | 546 | <b>51.8</b>   | 1781 | <b>49.3</b> | 2521 |  |
| Assisted faculty at another university with research                            | <b>16.5</b> | 91  | <b>6.1</b>      | 99  | <b>6.7</b>  | 541 | <b>8.9</b>    | 1769 | <b>8.6</b>  | 2500 |  |
| <i>Any research with faculty<sup>1</sup></i>                                    | <b>77.3</b> | 141 | <b>41.1</b>     | 141 | <b>45.6</b> | 542 | <b>57.8</b>   | 1774 | <b>55.6</b> | 2613 |  |
| Gave oral presentation/poster at UCLA                                           | <b>38.5</b> | 91  | <b>21.8</b>     | 101 | <b>16.9</b> | 543 | <b>25.6</b>   | 1769 | <b>24.0</b> | 2504 |  |
| Gave oral presentation/poster outside UCLA                                      | <b>28.6</b> | 91  | <b>8.9</b>      | 101 | <b>8.9</b>  | 542 | <b>11.3</b>   | 1767 | <b>11.3</b> | 2501 |  |
| Received scholarship for UG research                                            | <b>25.8</b> | 89  | <b>4.0</b>      | 101 | <b>5.5</b>  | 541 | <b>7.6</b>    | 1754 | <b>7.6</b>  | 2485 |  |
| Co-authored published paper with faculty                                        | <b>15.4</b> | 91  | <b>6.9</b>      | 101 | <b>5.5</b>  | 542 | <b>13.7</b>   | 1765 | <b>11.7</b> | 2499 |  |

\*Based on UCLA College Senior Survey responses (UG research survey); 2-point scale: 1 = "Yes," or 2 = "No, did not choose to" or "No, not available"

<sup>1</sup> Includes research center data. Two-point Scale: Yes (affirmative response to at least one of the following: (1) Assisted UCLA faculty in research for pay, (2) Assisted UCLA faculty in research as volunteer, or (3) Assisted faculty at another institution with research), (4) participated in a research program); No

**Supplementary table 2.** Participation in undergraduate research, pairwise comparisons by group\*: results of Chi-square test with Bonferroni post-hoc correction

|                                                                                                   |     | PEERS<br>(A)                                          | Control<br>(B)                     | Other URM<br>(C)                   | Other Non-<br>URM (D)              |
|---------------------------------------------------------------------------------------------------|-----|-------------------------------------------------------|------------------------------------|------------------------------------|------------------------------------|
| Assisted UCLA faculty in research for pay<br>$\chi^2(3, N=2509) = 19.7$<br>$p = 0.000$            | No  |                                                       | A ( $p=0.012$ )                    | A ( $p=0.001$ )                    | A ( $p=0.000$ )                    |
|                                                                                                   | Yes | B ( $p=0.012$ )<br>C ( $p=0.001$ )<br>D ( $p=0.000$ ) |                                    |                                    |                                    |
| Assisted UCLA faculty in research as a volunteer<br>$\chi^2(3, N=2521) = 31.3$<br>$p = 0.000$     | No  |                                                       |                                    | A ( $p=0.000$ )<br>D ( $p=0.000$ ) |                                    |
|                                                                                                   | Yes | C ( $p=0.000$ )                                       |                                    |                                    | C ( $p=0.000$ )                    |
| Assisted faculty at another university with research<br>$\chi^2(3, N=2500) = 31.3$<br>$p = 0.000$ | No  |                                                       |                                    | A ( $p=0.009$ )                    |                                    |
|                                                                                                   | Yes | C ( $p=0.009$ )                                       |                                    |                                    |                                    |
| Any research with faculty <sup>1</sup><br>$\chi^2(3, N=2598) = 64.42$<br>$p = 0.000$              | No  |                                                       | A ( $p=0.000$ )<br>D ( $p=0.001$ ) | A ( $p=0.000$ )<br>D ( $p=0.000$ ) | A ( $p=0.000$ )                    |
|                                                                                                   | Yes | B ( $p=0.000$ )<br>D ( $p=0.000$ )<br>D ( $p=0.000$ ) |                                    |                                    | B ( $p=0.001$ )<br>C ( $p=0.000$ ) |

\* Includes all UCLA College Senior Survey responses (UG research survey) and research center data; Results are based on two-sided tests. For each significant pair, the key of the category with the smaller column proportion appears in the category with the larger column proportion. Non-significant values ( $p>0.05$ ) are not displayed.

2-point scale: 1 = "Yes," or 2 = "No, did not choose to" or "No, not available"

<sup>1</sup> Includes research center data. Two-point Scale: Yes (affirmative response to at least one of the following: (1) Assisted UCLA faculty in research for pay, (2) Assisted UCLA faculty in research as volunteer, or (3) Assisted faculty at another institution with research), (4) participated in a research program); No

**Supplementary table 3. Logistic regression predicting (1) undergraduate research participation and (2) science degree completion, for all groups (N(1)= 2446, N(2)=2415). Bold print indicates statistically significant values. NA = not available / does not apply.**

|              | Research participation |        |              | Science degree completion* |        |              |
|--------------|------------------------|--------|--------------|----------------------------|--------|--------------|
|              | B (S.E.)               | Exp(B) | <i>p</i>     | B (S.E.)                   | Exp(B) | <i>p</i>     |
| Sex = Female | 0.10 (0.09)            | 1.103  | 0.276        | -0.16 (0.10)               | 0.851  | 0.116        |
| Math SAT     | 1.05 (0.17)            | 2.863  | <b>0.000</b> | 0.64 (0.17)                | 1.892  | <b>0.000</b> |
| HS GPA       | 0.00 (0.00)            | 1.002  | <b>0.000</b> | 0.01 (0.00)                | 1.008  | <b>0.000</b> |
| URM          | -0.16 (0.11)           | 0.849  | 0.139        | -0.28 (0.12)               | 0.756  | <b>0.019</b> |
| Low SES      | -0.06 (0.10)           | 0.941  | 0.541        | 0.08 (0.11)                | 1.086  | 0.461        |
| PEERS        | 1.50 (0.28)            | 4.502  | <b>0.000</b> | 0.68 (0.26)                | 1.982  | <b>0.009</b> |
| UG research  | NA                     | NA     | NA           | 1.13 (0.10)                | 3.081  | <b>0.000</b> |
| Constant     | -5.92 (0.80)           | 0.003  | <b>0.000</b> | -7.66 (0.82)               | 0.000  | <b>0.000</b> |

\* Excludes cases with no degree awarded or missing data

**Supplementary table 4.** Participation in faculty-mentored research, pairwise comparisons by group\*: results of Chi-square test with Bonferroni post-hoc correction

|                                                                                         |     | PEERS<br>(A)                              | Control<br>(B) | Other URM<br>(C)           | Other Non-<br>URM (D) |
|-----------------------------------------------------------------------------------------|-----|-------------------------------------------|----------------|----------------------------|-----------------------|
| Gave oral presentation/poster at UCLA<br>$\chi^2(3, N=2504) = 28.0$<br>$p = 0.000$      | No  |                                           |                | A (p=0.000)<br>D (p=0.000) | A (p=0.039)           |
|                                                                                         | Yes | C (p=0.000)<br>D (p=0.039)                |                |                            | C (p=0.000)           |
| Gave oral presentation/poster outside UCLA<br>$\chi^2(3, N=2501) = 30.9$<br>$p = 0.000$ | No  |                                           | A (p=0.003)    | A (p=0.000)                | A (p=0.000)           |
|                                                                                         | Yes | B (p=0.003)<br>C (p=0.000)<br>D (p=0.000) |                |                            |                       |
| Received scholarship for UG research<br>$\chi^2(3, N=2485) = 47.1$<br>$p = 0.000$       | No  |                                           | A (p=0.000)    | A (p=0.000)                | A (p=0.000)           |
|                                                                                         | Yes | B (p=0.000)<br>C (p=0.000)<br>D (p=0.000) |                |                            |                       |
| Co-authored published paper with faculty<br>$\chi^2(3, N=2499) = 30.2$<br>$p = 0.000$   | No  |                                           |                | A (p=0.000)<br>D (p=0.000) |                       |
|                                                                                         | Yes | C (p=0.004)                               |                |                            | C (p=0.000)           |

\* Includes all UCLA College Senior Survey responses (UG research survey); Results are based on two-sided tests. For each significant pair, the key of the category with the smaller column proportion appears in the category with the larger column proportion. Non-significant values ( $p > 0.05$ ) are not displayed.

2-point scale: 1 = "Yes," or 2 = "No, did not choose to" or "No, not available"

**Supplementary table 5.** Science degree completion, pairwise comparisons by group\*: results of Chi-square test with Bonferroni post-hoc correction

|                                                                         |     | PEERS<br>(A)               | Control<br>(B)             | Other URM<br>(C)           | Other Non-<br>URM (D)      |
|-------------------------------------------------------------------------|-----|----------------------------|----------------------------|----------------------------|----------------------------|
| Science degree completion<br>$\chi^2(3, N=3485) = 189.5$<br>$p = 0.000$ | No  |                            | A (p=0.001)<br>D (p=0.000) | A (p=0.000)<br>D (p=0.000) |                            |
|                                                                         | Yes | B (p=0.001)<br>C (p=0.000) |                            |                            | B (p=0.000)<br>C (p=0.000) |

Results are based on two-sided tests. For each significant pair, the key of the category with the smaller column proportion appears in the category with the larger column proportion. Non-significant values ( $p > 0.05$ ) are not displayed.

**Supplementary Table 6: Students' overall satisfaction with UCLA experience, by group\***

| Group (total number of survey respondents) | Academic experience |      |      | Campus life experience |      |      | Overall experience |      |      |
|--------------------------------------------|---------------------|------|------|------------------------|------|------|--------------------|------|------|
|                                            | M                   | SD   | N    | M                      | SD   | N    | M                  | SD   | N    |
| PEERS (N=92)                               | 3.28                | 0.60 | 92   | 3.30                   | 0.66 | 92   | 3.36               | 0.59 | 92   |
| Control (N=105)                            | 3.17                | 0.63 | 103  | 3.32                   | 0.65 | 103  | 3.31               | 0.61 | 103  |
| Other URM (N=563)                          | 3.14                | 0.65 | 554  | 3.31                   | 0.65 | 554  | 3.34               | 0.63 | 546  |
| Other Non-URM (N=1809)                     | 3.18                | 0.65 | 1797 | 3.40                   | 0.63 | 1790 | 3.38               | 0.62 | 1770 |
| All                                        | 3.17                | 0.65 | 2546 | 3.37                   | 0.64 | 2539 | 3.37               | 0.62 | 2511 |

\* Sample size reflects total from each group who participated in UCLA College Senior Survey between 2012 and 2015 and responded to the respective survey item;

4-point scale: 1=very dissatisfied, 2=dissatisfied, 3=satisfied, 4=very satisfied



## Codebook

| Variable                     | Description                                             | Values                | Value Label                                                             | Notes                                                                                                                                                                                    |
|------------------------------|---------------------------------------------------------|-----------------------|-------------------------------------------------------------------------|------------------------------------------------------------------------------------------------------------------------------------------------------------------------------------------|
| <i>Student records data:</i> |                                                         |                       |                                                                         |                                                                                                                                                                                          |
| MEMBER_CONTROL               | Membership in PEERS or matched control group            | 1<br>2                | CONTROL<br>PEERS                                                        | Control group created using propensity score matching as described in Toven-Lindsey 2015; N=282                                                                                          |
| GROUPS                       | Comparison groups                                       | 1<br>2<br>3<br>4      | Control<br>PEERS<br>Other Non-URM<br>Other URM                          | Other non-URM and Other URM are other life and physical sciences majors entering as freshmen in 2009 or 2010; 181 cases excluded from analysis as no information on URM status available |
| PEERS                        | PEERS versus all other groups                           | 1<br>2                | non-PEERS (all)<br>PEERS                                                | non-peers contains matched control group, other URM, other non-URM                                                                                                                       |
| URM_ALL                      | Underrepresented minority (URM) status                  | 1<br>2                | Non-URM<br>URM                                                          | URM includes African American, Latino/a, Chicano/a, Native American, Pacific Islander                                                                                                    |
| DEG_AWARD_YRS_ALL            | Degree Award -- # of years (ordinal)                    | 1<br>2<br>3<br>4<br>5 | Less than 4 years<br>4 years<br>5 years<br>6 years<br>More than 6 years |                                                                                                                                                                                          |
| DEG_AWARD_YRS_recode         | Degree Award - in number of years, recoded to be scalar | scale                 | N/A                                                                     | range: 3 - 7                                                                                                                                                                             |

|                                     |                                                                                      |        |                      |                                                                                                           |
|-------------------------------------|--------------------------------------------------------------------------------------|--------|----------------------|-----------------------------------------------------------------------------------------------------------|
| SEX_NUM_ALL                         | Student sex                                                                          | 1      | Male                 |                                                                                                           |
|                                     |                                                                                      | 2      | Female               |                                                                                                           |
| HS_GPA_ALL                          | High school GPA                                                                      | scale  | N/A                  | range: 0.0 - 5.0                                                                                          |
| SAT_MATH_ALL                        | SAT math score                                                                       | scale  | N/A                  | range: 260 - 800                                                                                          |
| act_major_name                      | Academic major name                                                                  | string | N/A                  |                                                                                                           |
| PELL_RECIPIENT                      | Pell Recipient (at least one term) as a proxy for low socioeconomic status (low SES) | 1      | Pell recipient       | Pell grants are awarded based on financial need and is used as a proxy for low socio-economic status here |
|                                     |                                                                                      | 2      | Did not receive Pell |                                                                                                           |
| GPA_GRADUATION                      | GPA at graduation                                                                    | scale  | N/A                  | Range: 2.1 – 4.0                                                                                          |
| DEGREE_DIV_SCIUPDATED_ALL           | Major division at graduation (Science degree)                                        | 1      | NOT SCIENCE          | Science degree: life or physical science majors; missing: did not graduate / left UCLA, still enrolled    |
|                                     |                                                                                      | 2      | SCIENCE              |                                                                                                           |
| <i>Senior survey response data:</i> |                                                                                      |        |                      |                                                                                                           |
| OverallAcad                         | Satisfied: Overall UCLA academic experience                                          | 1      | Very dissatisfied    | senior survey responses                                                                                   |
|                                     |                                                                                      | 2      | Dissatisfied         |                                                                                                           |
|                                     |                                                                                      | 3      | Satisfied            |                                                                                                           |
|                                     |                                                                                      | 4      | Very Satisfied       |                                                                                                           |
| OverallStuLife                      | Satisfied: Overall UCLA student and campus life                                      | 1      | Very dissatisfied    | senior survey responses                                                                                   |
|                                     |                                                                                      | 2      | Dissatisfied         |                                                                                                           |
|                                     |                                                                                      | 3      | Satisfied            |                                                                                                           |
|                                     |                                                                                      | 4      | Very Satisfied       |                                                                                                           |
| OverallExp                          | Satisfied: Overall UCLA experience                                                   | 1      | Very dissatisfied    | senior survey responses                                                                                   |
|                                     |                                                                                      | 2      | Dissatisfied         |                                                                                                           |
|                                     |                                                                                      | 3      | Satisfied            |                                                                                                           |
|                                     |                                                                                      | 4      | Very Satisfied       |                                                                                                           |
| RSCHPart01_binary                   | Assisted UCLA faculty in research for pay                                            | 1      | NO                   | senior survey responses                                                                                   |
|                                     |                                                                                      | 2      | YES                  |                                                                                                           |
| RSCHPart02_binary                   | Assisted UCLA faculty in research as a volunteer                                     | 1      | NO                   | senior survey responses                                                                                   |
|                                     |                                                                                      | 2      | YES                  |                                                                                                           |

|                                                                             |                                                                                                            |        |           |                                                                           |
|-----------------------------------------------------------------------------|------------------------------------------------------------------------------------------------------------|--------|-----------|---------------------------------------------------------------------------|
| RSCHPart03_binary                                                           | Assisted faculty at another university with research for pay or as a volunteer                             | 1<br>2 | NO<br>YES | senior survey responses                                                   |
| RSCHPart04_binary                                                           | Received a scholarship or fellowship on the basis of your undergraduate research                           | 1<br>2 | NO<br>YES | senior survey responses                                                   |
| RSCHPart05_binary                                                           | Received an award other than a scholarship or fellowship on the basis of your undergraduate research       | 1<br>2 | NO<br>YES | senior survey responses                                                   |
| RSCHPart06_binary                                                           | Gave an oral presentation or presented a poster at a research meeting at UCLA                              | 1<br>2 | NO<br>YES | senior survey responses                                                   |
| RSCHPart07_binary                                                           | Gave an oral presentation or presented a poster at a research meeting outside of UCLA                      | 1<br>2 | NO<br>YES | senior survey responses                                                   |
| RSCHPart08_binary                                                           | Co-authored a published paper with your faculty mentor                                                     | 1<br>2 | NO<br>YES | senior survey responses                                                   |
| RSCHPart09_binary                                                           | Worked as a member of a team on a class research project                                                   | 1<br>2 | NO<br>YES | senior survey responses                                                   |
| RESEARCH                                                                    | combo of Rschpart01, 02 and 03 and participation in research center programs or research for course credit | 0<br>1 | NO<br>YES | senior survey responses, undergraduate research center and registrar data |
| <i><u>National Clearinghouse Data (PEERS and matched control only):</u></i> |                                                                                                            |        |           |                                                                           |
| GRAD_binary                                                                 | Clearinghouse: Matriculated in grad school                                                                 | 0<br>1 | NO<br>YES | Enrolled in any graduate degree program                                   |
| MED_binary                                                                  | Clearinghouse: Medical school enrollment                                                                   | 0<br>1 | NO<br>YES |                                                                           |
| JD_binary                                                                   | Clearinghouse: JD enrollment                                                                               | 0<br>1 | NO<br>YES |                                                                           |
| PHARM_binary                                                                | Clearinghouse: PharmD enrollment                                                                           | 0<br>1 | NO<br>YES |                                                                           |
| PHD_binary                                                                  | Clearinghouse: PhD enrollment                                                                              | 0<br>1 | NO<br>YES |                                                                           |
| MSMA_binary                                                                 | Clearinghouse: MS/MA enrollment                                                                            | 0<br>1 | NO<br>YES |                                                                           |
| MSN_binary                                                                  | Clearinghouse: MSN enrollment                                                                              | 0<br>1 | NO<br>YES |                                                                           |
| MPH_binary                                                                  | Clearinghouse: MPH enrollment                                                                              | 0<br>1 | NO<br>YES |                                                                           |
| DDS                                                                         | Clearinghouse: DDS enrollment                                                                              | 0<br>1 | NO<br>YES |                                                                           |

|             |                                         |   |     |                                                       |
|-------------|-----------------------------------------|---|-----|-------------------------------------------------------|
| OTH_GRAD    | Clearinghouse: Other grad enrollment    | 0 | NO  |                                                       |
|             |                                         | 1 | YES |                                                       |
| UNKNOW_GRAD | Clearinghouse: Unknown grad degree type | 0 | NO  | Graduate degree type not available                    |
|             |                                         | 1 | YES |                                                       |
| DOCTORATE   | Clearinghouse: MD or PhD or PharmD      | 0 | NO  | Combination of PhD_binary, MD_binary and Pharm_binary |
|             |                                         | 1 | YES |                                                       |
